# Supplementary material for: Use of point of care quality improvement methodology to improve newborn care, immediately after birth, at a tertiary care teaching hospital, in a resource constraint setting
Source: PubMed Central journal article supplement — BMJ Open Qual. 2021 Aug 3;10(Suppl 1):e001445. doi: 10.1136/bmjoq-2021-001445 (PMC8336133; doi:10.1136/bmjoq-2021-001445), 2021-08-03
Supplement: bmjoq-2021-001445supp001.pdf [file bmjoq-2021-001445supp001.pdf]

| TABLE 1 EIBF (Problem analysis, PDSAs, Indicators used, Sustenance measures) |                                                                                                                                   |                                                                                                                                                |                                                                                                                   |                                                                                                                                                                                                                         |                                                                                                                                                |                   |                                                                                                                                                                                                                                                   |
|------------------------------------------------------------------------------|-----------------------------------------------------------------------------------------------------------------------------------|------------------------------------------------------------------------------------------------------------------------------------------------|-------------------------------------------------------------------------------------------------------------------|-------------------------------------------------------------------------------------------------------------------------------------------------------------------------------------------------------------------------|------------------------------------------------------------------------------------------------------------------------------------------------|-------------------|---------------------------------------------------------------------------------------------------------------------------------------------------------------------------------------------------------------------------------------------------|
| AIM                                                                          | Problem Analysis (Outcome)                                                                                                        | Change Idea Tested PDSAs                                                                                                                       | PDSA Outcome                                                                                                      | Outcome of Implementing Change idea (Scale up)                                                                                                                                                                          | Measures taken for ensuring sustenance                                                                                                         | Balancing measure | Monitored Indicator                                                                                                                                                                                                                               |
| Early Initiation of Breast Feeding (EIBF) with in 1 hour                     | 1. Mother & normal Newborn separated at birth<br><br>2. Delay in transfer of mother from LR to the post-delivery observation room | <b>PDSA 1</b><br>Early transfer of mother to a side room in less than 30 mins of delivery                                                      | PDSA Successful, advantages early mother and newborn together, still some mothers had difficulty feeding new-born | Both PDSAs then tested in both delivery points across different shifts.<br><br>Consensus was in easy replicability.<br><br>However, it did require the in charge on duty to supervise, data documentation was variable. | Emphasis on voluntary reporting, compliance improved.<br><br>Addition of a column in Labor room register, indicating time of first breast feed | -----             | % Of Normal newborn receiving breast feed within one hour of birth = Total nos. of newborns breast fed within one hour of birth / Total nos. of normal newborn delivery X 100.<br><br>Data reviewed weekly to bi weekly collated on monthly basis |
|                                                                              |                                                                                                                                   | <b>PDSA 2</b><br>Can Birth companion be asked to ensure breast feeding baby within one hour after birth?<br><i>Both Tested for 1 week each</i> | PDSA successful, nurse on duty could easily ensure EIBF despite more deliveries                                   |                                                                                                                                                                                                                         |                                                                                                                                                |                   |                                                                                                                                                                                                                                                   |
|                                                                              |                                                                                                                                   | <b>PDSA 3</b><br>PDSA 3 Initiating breast feeding on delivery table itself<br>Tested over 1 week                                               | PDSA abandoned. Required continuous presence of delivery assisting nurse by mothers' side                         |                                                                                                                                                                                                                         |                                                                                                                                                |                   |                                                                                                                                                                                                                                                   |

| TABLE 2 DCC (Problem analysis, PDSAs, Indicators used, Sustenance measures) |                                                                                                                                                                       |                                                                                     |                                                                                                                                                       |                                                                                                                                                                                      |                                                                                              |                                                            |                                                                                                                                                                                                                              |
|-----------------------------------------------------------------------------|-----------------------------------------------------------------------------------------------------------------------------------------------------------------------|-------------------------------------------------------------------------------------|-------------------------------------------------------------------------------------------------------------------------------------------------------|--------------------------------------------------------------------------------------------------------------------------------------------------------------------------------------|----------------------------------------------------------------------------------------------|------------------------------------------------------------|------------------------------------------------------------------------------------------------------------------------------------------------------------------------------------------------------------------------------|
| AIM                                                                         | Problem Analysis (Outcome)                                                                                                                                            | Change Idea Tested PDSAs                                                            | PDSA Outcome                                                                                                                                          | Outcome of Implementing Change idea (Scale up)                                                                                                                                       | Measures taken for ensuring sustenance                                                       | Balancing measure                                          | Monitored Indicator Collection                                                                                                                                                                                               |
| Delayed cord card clamping (DCC) after 1 min.                               | 1. No Knowledge<br>2. Procedural challenges?<br><br><i>Both nurses and doctors used to forget to do DCC as they used to separate newborn immediately after birth.</i> | <b>PDSA 1</b><br>Remind the delivering team to clamp cord after 1min in normal del. | Variable success, took long time                                                                                                                      | Variable compliance due to Change of delivery teams                                                                                                                                  | Policy for DCC formulated and sensitization done.                                            | Hypothermia detected by touch method at one hour of birth. | Percentage of Delayed Cord Clamp = Total nos. of normal deliveries with cord clamp after one minute / Total nos. of normal deliveries in labor room X 100<br><br>Data reviewed weekly to bi-weekly collated on monthly basis |
|                                                                             |                                                                                                                                                                       | <b>PDSA 2</b><br>Do cord clamping after drying on mother's abdomen                  | Difficult to dry on mother's abdomen, procedure variability, Requires more PDSAs for testing drying and giving Skin to skin care on mother's abdomen. | Multiple PDSAs required for testing & standardization of drying on mother's abdomen, doing delayed cord clamp and providing skin to skin care. Due to change of staff and transfers. | Addition of a column in Labor room register, for delayed cord clamping (Voluntary reporting) |                                                            |                                                                                                                                                                                                                              |

| <b>AIM</b>                                       | <b>Problem Analysis (Outcome)</b>                                                                                                                                                                      | <b>Change Idea Tested PDSAs</b>                                                                                                  | <b>PDSA Outcome</b>                                                                                                                                                                                                                                                                              | <b>Outcome of Implementing Change idea (Scale up)</b>                        | <b>Measures taken for ensuring sustenance</b>                                                                                            | <b>Balancing measure</b>                     | <b>Monitored Indicator</b>                                                                                                                                                            |
|--------------------------------------------------|--------------------------------------------------------------------------------------------------------------------------------------------------------------------------------------------------------|----------------------------------------------------------------------------------------------------------------------------------|--------------------------------------------------------------------------------------------------------------------------------------------------------------------------------------------------------------------------------------------------------------------------------------------------|------------------------------------------------------------------------------|------------------------------------------------------------------------------------------------------------------------------------------|----------------------------------------------|---------------------------------------------------------------------------------------------------------------------------------------------------------------------------------------|
| <b>Skin to Skin Contact (SCC) with in 1 hour</b> | 1. Acceptability by mother and delivery team.<br>2. How to do it?<br>3. No existing standard operating protocol.<br>4. High delivery load, shortage of staff<br>5. How to do Pre delivery counselling. | <b>PDSA 1.</b> Predelivery counselling of Mother for Skin-to-skin care                                                           | It took 12 weeks for developing and testing Counselling Protocol                                                                                                                                                                                                                                 | Counselling SOP framed; it was now convenient to take verbal consent.        | After standardization and SOP formation, compliance is optimum over last 18 months                                                       | Acceptability by mother and delivery LR team | Percentage of SSC = Total nos. of normal deliveries with SSC / Total nos. of normal deliveries in labor room X 100<br><br>Data reviewed weekly to bi-weekly collated on monthly basis |
|                                                  |                                                                                                                                                                                                        | <b>PDSA 2.</b> Developing SOPs for Skin-to-skin care.                                                                            | It took longer time, variable compliance, challenges faced<br><br>(a) the minimum duration of baby on mother's abdomen. (2-5mins max)<br><br>(b) position of keeping baby on mother's abdomen<br><br>(c) how to prolong duration of baby on mother's abdomen for recommended duration of 1 hour. | Both nurse and mother understood the process of newborn care to be followed. | 8 - 12 months in developing SOP which was feasible and could be followed. Sensitization of all teams was also done.                      |                                              |                                                                                                                                                                                       |
|                                                  |                                                                                                                                                                                                        | <b>PDSA 3.</b> Minimising the duration of Skin-to-Skin care on Delivery table & continuing it in post-delivery observation room. | This PDSA was successful, as it ensured mother with baby were comfortable in observation room, with supervising family member. & Nurse was free to attend other duties.                                                                                                                          | --                                                                           | Keeping new born over mother's abdomen resulted in significant improvement in the practice of the Delayed cord cut in the delivery room. |                                              |                                                                                                                                                                                       |
